# Supplementary material
Source: PubMed Central journal article supplement (PMC3449077)
Supplement: ejhg201258x1.pdf [file ejhg201258x1.pdf]

# Sampling Strategies for Rare Variant Tests in Case-Control Studies

## Supplementary Figure

---

Sebastian Zöllner

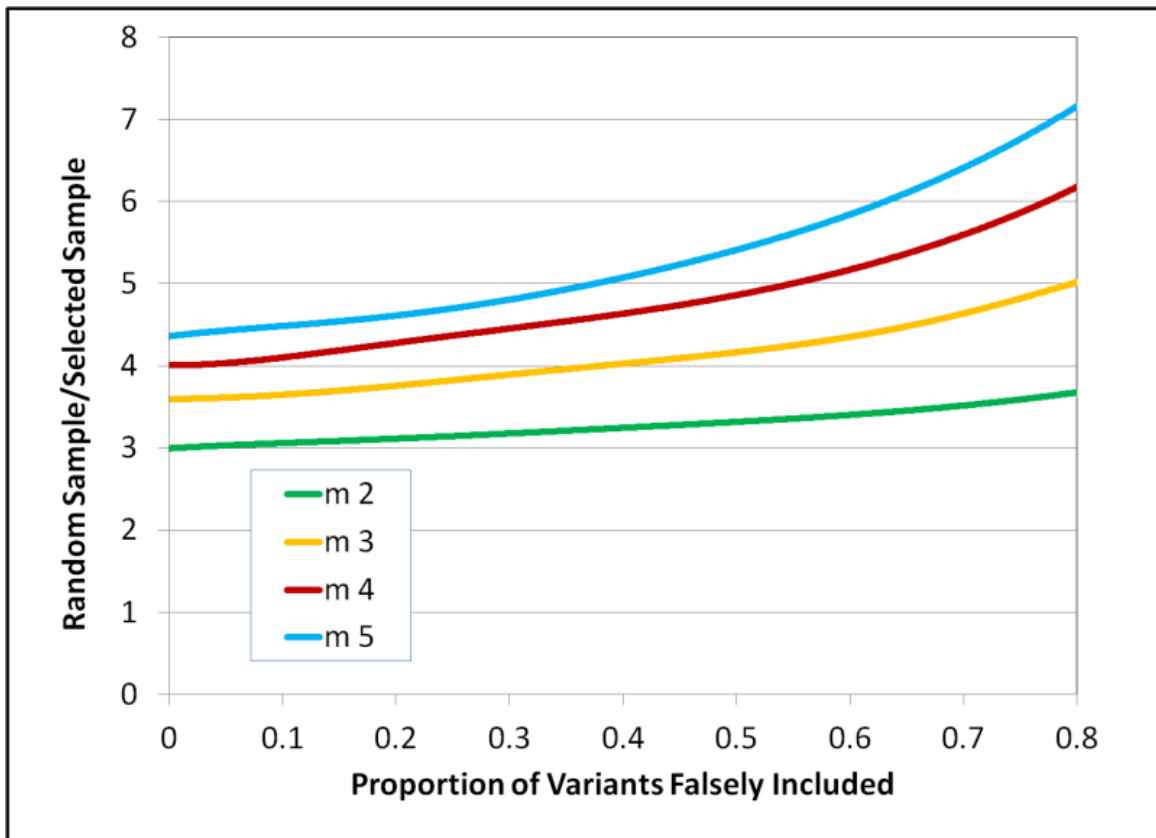

**Supplemental Figure 1: Ratio of selected cases and random cases required for achieving 80% power for different proportions of falsely included variants. Correctly included variants have a mean effect size designated by  $m$ , falsely included variants have an effect size of  $m=1$ . Calculations are based on a summed frequency  $p = 0.01$ .**
