# Supplementary material
Source: PubMed Central journal article supplement (PMC3449077)
Supplement: ejhg201258x2.pdf [file ejhg201258x2.pdf]

## Text S1: Multiplicative Model

I first calculate the expected contribution under a multiplicative model to the prevalence  $E(K_L)$  and the recurrence risk  $E(K_L K_{LR})$  for a pair of individuals with relationship  $R$ . Then I show the individual terms for calculating  $Pr(AA_R|H, S)$  that are used in equation (8).

The contribution to prevalence can be calculated by integrating over all possible effect sizes

$$\begin{aligned} E(K_L) &= \int [p^2(\omega_1\omega_2) + 2p(1-p)\omega_1 + (1-p)^2] f(\omega_1)f(\omega_2)d\omega_1d\omega_2 \\ &= p^2 \int \omega_1 \int [\omega_2 f(\omega_2)] f(\omega_1) d\omega_2 d\omega_1 + 2p(1-p) \int \omega_1 f(\omega_1) d\omega_1 + (1-p)^2 \\ &= p^2 \mu^2 + 2p(1-p)\mu + (1-p)^2 = (p\mu + 1 - p)^2 = (1 + p(\mu - 1))^2 \end{aligned}$$

To calculate  $E(K_L K_{LR})$  I apply the law of total probability by conditioning on the number  $S$  of chromosomes shared between the relatives. For  $S = 0$

$$E(K_L K_{LR} | S = 0) = E(K_L)^2 = (1 + p(\mu - 1))^4.$$

When considering relative pairs with shared carrier chromosomes, some risk haplotypes may occur in multiple individuals IBD. The contribution of these chromosomes to the overall penetrance includes the term  $\int \omega_S^2 f(\omega) d\omega = \mu^2 + \sigma^2$ . When conditioning on  $S = 1$ , I consider the relative risk  $\omega_S$  of shared chromosome and the penetrances  $\omega_1, \omega_2$  of the 2 non-shared chromosomes.

$$\begin{aligned} E(K_L K_{LR} | S = 1) &= \\ &= (1-p)^3 + p(1-p)^2 \int \omega_1 f(\omega_1) d\omega_1 + p(1-p)^2 \int \omega_2 f(\omega_2) d\omega_2 \\ &+ p(1-p)^2 \int \omega_S^2 f(\omega_S) d\omega_S + p^2 (1-p) \int (\omega_1 \omega_S) \omega_S f(\omega_1) f(\omega_S) d\omega_1 d\omega_S \\ &+ p^2 (1-p) \int (\omega_2 \omega_S) \omega_S f(\omega_2) f(\omega_S) d\omega_2 d\omega_S + p^2 (1-p) \int \omega_1 \omega_2 f(\omega_1) f(\omega_2) d\omega_1 d\omega_2 + \\ &+ p^3 \int (\omega_1 \omega_S) (\omega_2 \omega_S) f(\omega_1) f(\omega_2) f(\omega_S) d\omega_1 d\omega_2 d\omega_S = \\ &= (1-p)^3 + 2(1-p)^2 p\mu + (1-p)p^2\mu^2 + (1-p)^2 p(\mu^2 + \sigma^2) + 2(1-p)p^2 \mu(\mu^2 + \sigma^2) + \\ &p^3 \mu^2 (\mu^2 + \sigma^2) = (1-p)((1-p)^2 + 2(1-p)p\mu + p^2 \mu^2) + p(\mu^2 + \sigma^2)((1-p) + p\mu)^2 = \\ &= ((1-p) + p\mu)^2 ((1-p) + p(\mu^2 + \sigma^2)) = E(K_L)(1 + p(\mu^2 + \sigma^2 - 1)) \end{aligned}$$

When conditioning on two shared chromosomes, I integrate over the penetrances  $\omega_{S1}, \omega_{S2}$ .

$$E(K_L K_{LR} | S = 2)$$

$$\begin{aligned} &= (1 - p)^2 + 2p(1 - p) \int \omega_{S1}^2 f(\omega_{S1}) d\omega_{S1} + p^2 \int \omega_{S1}^2 \omega_{S2}^2 f(\omega_{S1}) f(\omega_{S2}) d\omega_{S1} d\omega_{S2} \\ &= (1 + p(\mu^2 + \sigma^2 - 1))^2 \end{aligned}$$

Then the expectation of  $K_L K_{LR}$  can be calculated by summing over  $S$ :

$$E(K_L K_{LR}) = \sum_S E(K_L K_{LR} | S) P(S | R)$$

To calculate the probability of observing  $H$  risk haplotypes in the sampled individual requires calculating  $\sum_S \Pr(AA_R | H, S) \Pr(S)$ . Under a multiplicative model,  $\Pr(AA_R | H, S)$  can be calculated up to a constant that depends on the overall prevalence and relative recurrence risk (See equation (7)) by integrating over the genotype in the affected relative  $H_R$ . Conditional on  $S = 0$ , the additive effect of all risk haplotypes is independent. Hence:

$$P(AA_R | H = h_1, H_R = h_2, S = 0) \propto \mu^{h_1 + h_2}$$

To account for such shared risk chromosomes for  $S > 0$ , define  $H_S$  as the number of shared risk haplotypes ( $H_S \leq S$ ). Then

$$P(AA_R | H = h_1, H_R = h_2, H_S = h_s) \propto \mu^{h_1 + h_2} + 1_{h_s > 0} \mu^{h_1 + h_2 - 2h_s} \sigma^{2h_s}.$$

From this we can then calculate by integrating over  $H_R$ .

$$Pr(AA_R | H = 0, S = 0) \propto (1 - p)^2 + 2p(1 - p)\mu + p^2\mu^2 = (1 + p(\mu - 1))^2$$

$$Pr(AA_R | H = 1, S = 0) \propto (1 - p)^2\mu + 2p(1 - p)\mu^2 + p^2\mu^3 = \mu(1 + p(\mu - 1))^2$$

$$Pr(AA_R | H = 2, S = 0) \propto (1 - p)^2\mu^2 + 2p(1 - p)\mu^3 + p^2\mu^4 = \mu^2(1 + p(\mu - 1))^2$$

$$Pr(AA_R | H = 0, S = 1) \propto 1 - p + (p\mu) = 1 + p(\mu - 1)$$

$$Pr(AA_R | H = 1, S = 1) \propto \frac{1}{2}((1 - p)\mu + p\mu^2) + \frac{1}{2}((1 - p)(\mu^2 + \sigma^2) + p\mu(\mu^2 + \sigma^2))$$

$$Pr(AA_R | H = 2, S = 1) \propto ((1 - p)\mu(\mu^2 + \sigma^2) + p\mu^2(\mu^2 + \sigma^2))$$

$$Pr(AA_R | H = 0, S = 2) \propto 1$$

$$Pr(AA_R | H = 1, S = 2) \propto (\mu^2 + \sigma^2)$$

$$\Pr(AA_R|H = 2, S = 2) \propto (\mu^2 + \sigma^2)^2$$

Based on these equations, the probability of observing  $h$  risk haplotypes in an individual is

$$\Pr(H = h|AA_R) = \Pr(AA_R|H = h) \frac{\Pr(H = h)}{\sum_H \Pr(AA_R|H) \Pr(H)};$$

here the normalizing constant cancels.
