# Supplementary material
Source: PubMed Central journal article supplement (PMC3449077)
Supplement: ejhg201258x3.pdf [file ejhg201258x3.pdf]

## Text S2: Additive Model

I will first calculate the expected contribution under an additive model to the prevalence  $E(K_L)$  and the recurrence risk  $E(K_L K_{LR})$ . Then I will show the individual terms for calculating  $Pr(AA_R|H, S)$  that are used in equation (8).

The contribution to prevalence can be calculated by integrating over all possible effect sizes

$$E(K_L) = \int [p^2(\omega_1 + \omega_2) + 2p(1-p)\omega_1] f(\omega_1)f(\omega_2)d\omega_1d\omega_2 = 2p \int \omega f(\omega)d\omega = 2p\mu$$

Conditioning on  $S = 0$ :

$$E(K_L K_{LR}|S = 0) = E(K_L)^2 = 4p^2\mu^2.$$

When considering relative pairs with shared carrier chromosomes, some risk haplotypes may occur in multiple individuals IBD. The contribution of these chromosomes to the overall penetrance includes the term  $\int \omega_S^2 f(\omega)d\omega = \mu^2 + \sigma^2$ . When conditioning on  $S = 1$ , define the penetrance  $\omega_S$  of shared chromosome and the penetrances  $\omega_1, \omega_2$  of the 2 non-shared chromosomes.

$$\begin{aligned} E(K_L K_{LR}|S = 1) &= p(1-p)^2 \int \omega_S^2 f(\omega_S)d\omega_S + p^2(1-p) \int (\omega_1 + \omega_S)\omega_S f(\omega_1)f(\omega_S)d\omega_1d\omega_S \\ &+ p^2(1-p) \int (\omega_2 + \omega_S)\omega_S f(\omega_2)f(\omega_S)d\omega_1d\omega_S + p^2(1-p) \int \omega_1\omega_2 f(\omega_1)f(\omega_2)d\omega_1d\omega_2 \\ &+ p^3 \int (\omega_1 + \omega_S)(\omega_2 + \omega_S)f(\omega_1)f(\omega_2)f(\omega_S)d\omega_1d\omega_2d\omega_S = 3p^2\mu^2 + p(\mu^2 + \sigma^2) \end{aligned}$$

When conditioning on two shared chromosomes, integrate over the penetrances  $\omega_{S1}, \omega_{S2}$ :

$$\begin{aligned} E(K_L K_{LR}|S = 2) &= 2p(1-p) \int \omega_{S1}^2 f(\omega_{S1})d\omega_{S1} + p^2 \int (\omega_{S1} + \omega_{S2})^2 f(\omega_{S1})f(\omega_{S2})d\omega_{S1}d\omega_{S2} \\ &= 2p^2\mu^2 + 2p(\mu^2 + \sigma^2) \end{aligned}$$

Hence the expectation of  $K_L K_{LR}$  is then:  $E(K_L K_{LR}) = Pr(S = 0) \cdot 4p^2\mu^2 + Pr(S = 1) \cdot (3p^2\mu^2 + p(\mu^2 + \sigma^2)) + Pr(S = 2) \cdot (2p^2\mu^2 + 2p(\mu^2 + \sigma^2))$ .

The individual terms  $Pr(AA_R|H, S)$  can be calculated by integrating over the genotype in the affected relative  $H_R$ : Conditional on  $S = 0$ , the additive effect of all risk haplotypes is independent. Hence:

$$Pr(AA_R|H = h_1, H_R = h_2, S = 0) = h_1 h_2 \mu^2 + (h_1 + h_2)\mu K_G + K_G K_{GR}.$$

To account for such shared risk chromosomes for  $S > 0$ , define  $H_S$  for the number of shared risk haplotypes ( $H_S \leq S$ ). Then

$$Pr(AA_R|H = h_1, H_R = h_2, H_S = h_s) = h_1 h_2 \mu^2 + h_s \sigma^2 + (h_1 + h_2) \mu K_G + K_G K_{GR}.$$

From this,  $Pr(AA_R)$  can then be calculated by integrating over  $H_R$ .

$$Pr(AA_R|H = 0, S = 0) = (2p\mu)K_G + K_G K_{GR}$$

$$Pr(AA_R|H = 1, S = 0) = 2p\mu^2 + (\mu + 2p\mu)K_G + K_G K_{GR}$$

$$Pr(AA_R|H = 2, S = 0) = 4p\mu^2 + (2\mu + 2p\mu)K_G + K_G K_{GR}$$

$$Pr(AA_R|H = 0, S = 1) = (p\mu)K_G + K_G K_{GR}$$

$$Pr(AA_R|H = 1, S = 1) = \frac{1}{2}(p\mu^2 + (\mu + p\mu)K_G) + \frac{1}{2}(p\mu^2 + \mu^2 + \sigma^2 + (2\mu + p\mu)K_G) + K_G K_{GR} = p\mu^2 + \frac{1}{2}(\mu^2 + \sigma^2) + \left(\frac{3}{2}\mu + p\mu\right)K_G + K_G K_{GR}$$

$$Pr(AA_R|H = 2, S = 1) = 2\mu^2 + 2p\mu^2 + \sigma^2 + (3 + p)\mu K_G + K_G K_{GR}$$

$$Pr(AA_R|H = 0, S = 2) = K_G K_{GR}$$

$$Pr(AA_R|H = 1, S = 2) = (\mu^2 + \sigma^2) + 2\mu K_G + K_G K_{GR}$$

$$Pr(AA_R|H = 2, S = 2) = 2(\mu^2 + \sigma^2) + 2\mu^2 + 4\mu K_G + K_G K_{GR}$$
